# Supplementary material for: An Integrative Approach for Mapping Differentially Expressed Genes and Network Components Using Novel Parameters to Elucidate Key Regulatory Genes in Colorectal Cancer
Source: PLoS One. 2015 Jul 29;10(7):e0133901. doi: 10.1371/journal.pone.0133901 (PMC4519280; doi:10.1371/journal.pone.0133901)
Supplement: S6 Table — (XLSX) [file pone.0133901.s009.xlsx]

## Sheet: Sheet1
Network motif ID (Abbreviations)	DCC	CASP3	TGFB1	PIK3R5	CASP9	APPL1	CASP3	APC2	SMAD2	TGFBR1	SMAD4	MLH1	MSH2	KRAS	ARAF	MAPK8	AXIN1	AXIN1	RALGDS	RHOA	BIRC5	MYC	CCND1	APC2	MAP2K1	MAPK1	JUN	FOS	MYC	CYCS	BCL2	TP53	LEF1	GSK3B	GSK3B	CTNNB1	CTNNB1	AKT3	BAD	CASP9	MSH6	BAX	MSH3	TGFBR2
0000001000011000' (4a)	1	1	0	4	0	0	1	0	0	0	0	0	0	5	4	1	0	0	1	1	2	2	2	0	7	7	2	2	2	0	0	0	7	3	6	3	5	5	1	1	0	0	0	0
0000000000011100' (4b)	0	0	0	3	0	0	0	0	0	0	0	0	0	0	0	0	0	0	0	0	4	4	4	0	3	3	2	2	2	0	0	0	6	0	2	3	3	3	2	2	0	0	0	0
0000000000001110' (4c)	0	0	0	1	0	0	0	0	0	0	0	0	0	1	1	0	0	0	1	0	1	1	1	0	0	1	1	1	1	0	0	0	1	0	1	0	0	1	1	1	0	0	0	0
0000010000010000000101000' (5a)	0	0	0	0	0	0	0	0	0	0	0	0	0	0	0	0	0	0	0	0	2	2	2	0	0	0	0	0	0	0	0	0	6	3	3	6	6	0	0	0	0	0	0	0
0000000000000010000111000' (5b)	0	0	0	0	0	0	0	0	0	0	0	0	0	0	0	0	0	0	0	0	2	2	2	0	0	0	0	0	0	0	0	0	3	0	0	3	3	0	0	0	0	0	0	0
0000000000000100100010100' (5c)	0	0	0	8	0	0	0	0	0	0	0	0	0	10	6	2	0	0	6	2	0	0	0	0	2	2	0	0	0	0	0	0	2	0	4	0	2	8	3	3	0	0	0	0
000000000000000010000001000001110000' (6a)	0	0	0	0	0	0	0	0	0	0	0	0	0	0	0	0	0	0	0	0	4	4	4	0	0	0	0	0	0	0	0	0	6	3	3	6	6	0	0	0	0	0	0	0
000000000000000000000010001000110100' (6b)	0	0	0	5	0	0	0	0	0	0	0	0	0	5	5	1	0	0	5	1	0	0	0	0	1	1	0	0	0	0	0	0	1	0	2	0	1	4	2	2	0	0	0	0
000000000000010000000010100000001100' (6c)	0	0	0	8	0	0	0	0	0	0	0	0	0	10	6	2	0	0	6	6	0	0	0	0	6	2	0	0	0	0	0	0	0	0	2	0	0	8	2	2	0	0	0	0
000000000000000100000010000001110000' (6d)	0	0	0	0	0	0	0	0	0	0	0	0	0	3	3	0	0	0	0	0	2	2	2	0	3	3	2	2	2	0	0	0	3	0	3	0	3	3	0	0	0	0	0	0
000000000000000000000010011000100100' (6e)	0	0	0	6	0	0	0	0	0	0	0	0	0	6	3	0	0	0	3	0	0	0	0	0	0	0	0	0	0	0	0	0	0	0	4	0	0	6	4	4	0	0	0	0
000000100000000010000001010000010000' (6f)	0	0	0	0	0	0	0	0	0	0	0	0	0	0	0	0	0	0	0	0	1	1	1	0	0	0	0	0	0	0	0	0	3	3	3	3	3	0	0	0	0	0	0	0
000000100000010000000001010000000010' (6g)	0	0	0	0	0	0	0	0	0	0	0	0	0	0	0	0	0	0	0	0	1	1	1	0	0	0	0	0	0	0	0	0	3	0	3	3	3	3	0	0	0	0	0	0
000000000000000000000001000001111000' (6g)	0	0	0	0	0	0	0	0	0	0	0	0	0	0	0	0	0	0	0	0	1	1	1	0	0	0	0	0	0	0	0	0	1	0	0	1	1	0	0	0	0	0	0	0
0000000000000000000000000100000001000100001101000' (7a)	0	0	0	4	0	0	0	0	0	0	0	0	0	4	4	0	0	0	4	0	1	1	1	0	3	3	1	1	1	0	0	0	3	0	4	0	4	4	3	3	0	0	0	0
0000000000000000000000000000000001000110001100100' (7b)	0	0	0	3	0	0	0	0	0	0	0	0	0	3	3	0	0	0	3	0	0	0	0	0	0	0	0	0	0	0	0	0	0	0	2	0	0	3	2	2	0	0	0	0
0000000000000000010000000010000000100000011100000' (7c)	0	0	0	0	0	0	0	0	0	0	0	0	0	0	0	0	0	0	0	0	2	2	2	0	0	0	0	0	0	0	0	0	3	0	3	3	3	3	0	0	0	0	0	0
0000000000000000001000000010000000100000011100000' (7d)	0	0	0	0	0	0	0	0	0	0	0	0	0	0	0	0	0	0	0	0	2	2	2	0	0	0	0	0	0	0	0	0	3	3	3	3	3	0	0	0	0	0	0	0
0000000100000000000100000001010000001000000000100' (7e)	0	0	0	0	0	0	0	0	0	0	0	0	0	0	0	0	0	0	0	0	1	1	1	0	0	0	0	0	0	0	0	0	3	3	3	3	3	3	0	0	0	0	0	0
0000000100000001000000000010010000000000010000100' (7f)	0	0	0	3	0	0	0	0	0	0	0	0	0	0	0	0	0	0	0	0	1	1	1	0	0	0	0	0	0	0	0	0	3	0	3	3	3	3	0	0	0	0	0	0
0000000000000000000000000000000000100011001110000' (7g)	0	0	0	2	0	0	0	0	0	0	0	0	0	2	1	0	0	0	1	0	0	0	0	0	0	0	0	0	0	0	0	0	0	0	2	0	0	2	2	2	0	0	0	0
0000000000000000000000000001000001000010001110000' (7h)	0	0	0	0	0	0	0	0	0	0	0	0	0	1	1	0	0	0	0	0	1	1	1	0	1	1	1	1	1	0	0	0	1	0	1	0	1	1	0	0	0	0	0	0
0000000000000000000000000001000000100010001110000' (7i)	0	0	0	0	0	0	0	0	0	0	0	0	0	0	0	0	0	0	0	0	2	2	2	0	0	0	0	0	0	0	0	0	2	1	1	2	2	0	0	0	0	0	0	0
0000000000000000001000000010100000001000000011000' (7j)	0	0	0	6	0	0	0	0	0	0	0	0	0	7	4	4	0	0	4	4	0	0	0	0	4	4	0	0	0	0	0	0	0	0	2	0	0	6	2	2	0	0	0	0
0000000000000000010000000100010000000001001010000' (7k)	0	0	0	0	0	0	0	0	0	0	0	0	0	0	0	0	0	0	0	0	2	2	2	0	0	0	0	0	0	0	0	0	6	0	6	6	6	6	3	3	0	0	0	0
0000000000000000000000010000000001011000000001100' (7l)	0	0	0	6	0	0	0	0	0	0	0	0	0	6	3	0	0	0	3	3	0	0	0	0	3	0	0	0	0	0	0	0	0	0	4	0	0	6	4	4	0	0	0	0
0000000000000000001000100000000001010000000011000' (7m)	0	0	0	5	0	0	0	0	0	0	0	0	0	8	7	0	0	0	4	4	0	0	0	0	7	6	2	2	2	0	0	0	0	0	2	0	2	5	0	0	0	0	0	0
0000000000000000000000010000000001001000001001100' (7n)	0	0	0	10	0	0	0	0	0	0	0	0	0	10	10	2	0	0	10	6	0	0	0	0	6	2	0	0	0	0	0	0	0	0	2	0	0	8	2	2	0	0	0	0
0000000000000000010000000100000001001000001010000' (7o)	0	0	0	5	0	0	0	0	0	0	0	0	0	8	7	0	0	0	4	0	0	0	0	0	6	6	2	2	2	0	0	0	2	0	2	0	2	2	0	0	0	0	0	0
0000000000000000000000000000001000000010000100000110000010000100' (8a)	0	0	0	0	0	0	0	0	0	0	0	0	0	0	0	0	0	0	0	0	4	4	4	0	0	0	0	0	0	0	0	0	6	0	6	6	6	6	3	3	0	0	0	0
0000000000000000000000000000010000000010001000000100000010011000' (8b)	0	0	0	7	0	0	0	0	0	0	0	0	0	7	7	4	0	0	7	4	0	0	0	0	4	4	0	0	0	0	0	0	0	0	2	0	0	6	2	2	0	0	0	0
0000000000000000000000000000001010000000000010000110000000010100' (8c)	0	0	0	6	0	0	0	0	0	0	0	0	0	6	3	3	0	0	3	3	0	0	0	0	3	3	0	0	0	0	0	0	0	0	4	0	0	6	4	4	0	0	0	0
0000000000000000000000000000000000010000000000100110000010001100' (8d)	0	0	0	6	0	0	0	0	0	0	0	0	0	6	6	0	0	0	6	3	0	0	0	0	3	0	0	0	0	0	0	0	0	0	4	0	0	6	4	4	0	0	0	0
0000000000000000000000000010000000000010000010001100000000010100' (8e)	0	0	0	3	0	0	0	0	0	0	0	0	0	6	6	0	0	0	3	3	0	0	0	0	6	6	4	4	4	0	0	0	0	0	0	0	0	3	0	0	0	0	0	0
0000000000000000000000000000001000000001000100000110000010000100' (8f)	0	0	0	6	0	0	0	0	0	0	0	0	0	0	0	0	0	0	0	0	4	4	4	0	0	0	0	0	0	0	0	0	6	0	6	0	6	6	3	3	0	0	0	0
0000000000000000000100000000100001000000000000100000000110100000' (8g)	0	0	0	6	0	0	0	0	0	0	0	0	0	6	0	0	0	0	0	0	2	2	2	0	0	0	0	0	0	0	0	0	6	0	6	0	6	6	3	3	0	0	0	0
0000000000000000000000000000010000100000000000100100000010011000' (8h)	0	0	0	8	0	0	0	0	0	0	0	0	0	8	8	0	0	0	8	4	0	0	0	0	7	6	2	2	2	0	0	0	0	0	2	0	2	5	0	0	0	0	0	0
0000000000000000000100000000100000000100000000100100000010100000' (8i)	0	0	0	6	0	0	0	0	0	0	0	0	0	6	3	0	0	0	3	0	2	2	2	0	0	0	0	0	0	0	0	0	6	0	6	0	6	6	0	0	0	0	0	0
0000000000000000000100000000100001000000000000100000100010100000' (8j)	0	0	0	0	0	0	0	0	0	0	0	0	0	0	0	0	0	0	0	0	2	2	2	0	0	0	0	0	0	0	0	0	6	6	6	6	6	6	3	3	0	0	0	0
0000000000000000000000000000001000100000010000001000000000011100' (8k)	0	0	0	5	0	0	0	0	0	0	0	0	0	5	5	1	0	0	5	5	0	0	0	0	5	1	0	0	0	0	0	0	0	0	1	0	0	5	1	1	0	0	0	0
0000000000000000000000000010000000000010100000000100010000011000' (8l)	0	0	0	4	0	0	0	0	0	0	0	0	0	4	2	0	0	0	2	2	0	0	0	0	2	0	0	0	0	0	0	0	0	0	4	0	4	4	2	2	0	0	0	0
0000000000000000000000000000100000000100000000100010000011010000' (8m)	0	0	0	4	0	0	0	0	0	0	0	0	0	4	4	0	0	0	4	0	0	0	0	0	3	3	1	1	1	0	0	0	1	0	1	0	1	1	0	0	0	0	0	0
0000000000000000000000000000100000000100001000000000000111010000' (8n)	0	0	0	3	0	0	0	0	0	0	0	0	0	0	0	0	0	0	0	0	1	1	1	0	0	0	0	0	0	0	0	0	3	0	3	0	3	3	3	3	0	0	0	0
0000000000000000000010000000001000000100000000010000000111000000' (8o)	0	0	0	0	0	0	0	0	0	0	0	0	0	0	0	0	0	0	0	0	2	2	2	0	0	0	0	0	0	0	0	0	3	3	3	3	3	3	0	0	0	0	0	0
0000000010000000010000000000010001000000000000100000000100001000' (8p)	0	0	0	3	0	0	0	0	0	0	0	0	0	3	0	0	0	0	0	0	1	1	1	0	0	0	0	0	0	0	0	0	3	0	3	3	3	3	0	0	0	0	0	0
0000000000000000000010000000001000010000000000010000000111000000' (8q)	0	0	0	3	0	0	0	0	0	0	0	0	0	0	0	0	0	0	0	0	2	2	2	0	0	0	0	0	0	0	0	0	3	0	3	3	3	3	0	0	0	0	0	0
0000000000000000000010000000001000000100000100000000000111000000' (8r)	0	0	0	3	0	0	0	0	0	0	0	0	0	3	0	0	0	0	0	0	2	2	2	0	0	0	0	0	0	0	0	0	3	0	3	0	3	3	0	0	0	0	0	0
0000000000000000000000000000100000000100001000000000010011010000' (8s)	0	0	0	0	0	0	0	0	0	0	0	0	0	0	0	0	0	0	0	0	1	1	1	0	0	0	0	0	0	0	0	0	3	0	3	3	3	3	3	3	0	0	0	0
0000000010000000000010000000000101000000010000000000010000000010' (8t)	0	0	0	3	0	0	0	0	0	0	0	0	0	0	0	0	0	0	0	0	1	1	1	0	0	0	0	0	0	0	0	0	3	3	3	3	3	3	0	0	0	0	0	0
0000000000000000000100000000100000000100010000000100000010100000' (8u)	0	0	0	2	0	0	0	0	0	0	0	0	0	2	1	0	0	0	1	0	0	0	0	0	0	0	0	0	0	0	0	0	2	0	2	2	2	2	0	0	0	0	0	0
0000000000000000000100000100000000000001010000000000100010100000' (8v)	0	0	0	2	0	0	0	0	0	0	0	0	0	2	0	0	0	0	0	0	0	0	0	0	0	0	0	0	0	0	0	0	2	0	2	2	2	2	1	1	0	0	0	0
0000000000000000000000000000000000000001000100000000110011100000' (8w)	0	0	0	2	0	0	0	0	0	0	0	0	0	2	1	0	0	0	1	1	0	0	0	0	1	0	0	0	0	0	0	0	0	0	2	0	0	2	2	2	0	0	0	0
0000000000000000000000000000000000000000000000100011100011000100' (8x)	0	0	0	1	0	0	0	0	0	0	0	0	0	1	1	0	0	0	1	0	0	0	0	0	0	0	0	0	0	0	0	0	0	0	1	0	0	1	1	1	0	0	0	0
0000000000000000000000000000010000000010000000010000000111100000' (8y)	0	0	0	0	0	0	0	0	0	0	0	0	0	0	0	0	0	0	0	0	1	1	1	0	0	0	0	0	0	0	0	0	1	1	1	1	1	0	0	0	0	0	0	0
0000000000000000000000000000100000000010000000010000000111100000' (8z)	0	0	0	0	0	0	0	0	0	0	0	0	0	0	0	0	0	0	0	0	1	1	1	0	0	0	0	0	0	0	0	0	1	0	1	1	1	1	0	0	0	0	0	0
	1	1	0	162	0	0	1	0	0	0	0	0	0	160	115	20	0	0	99	52	58	58	58	0	86	64	20	20	20	0	0	0	126	32	154	81	129	188	68	68	0	0	0	0
